# Supplementary material for: In Vitro Expansion of Corneal Endothelial Cells on Biomimetic Substrates
Source: PubMed Central journal article supplement — Sci Rep. 2015 Jan 22;5:7955. doi: 10.1038/srep07955 (PMC4302312; doi:10.1038/srep07955), 2015-01-22
Supplement: srep07955-s1.pdf [file srep07955-s1.pdf]

## Supplementary Information

### **In Vitro Expansion of Corneal Endothelial Cells on Biomimetic Substrates**

Rachelle N. Palchesko<sup>1,2,3</sup>, Kira L. Lathrop<sup>2,3</sup>, James L. Funderburgh<sup>2,3</sup>, Adam W. Feinberg<sup>1,4\*</sup>

<sup>1</sup> *Department of Biomedical Engineering, Carnegie Mellon University, Pittsburgh, PA 15213*

<sup>2</sup> *Department of Ophthalmology, University of Pittsburgh, Pittsburgh PA, 15213*

<sup>3</sup> *Louis J. Fox Center for Vision Restoration, Pittsburgh PA 15213*

<sup>4</sup> *Department of Materials Science and Engineering, Carnegie Mellon University, Pittsburgh PA 15213*

\* Corresponding author: [feinberg@andrew.cmu.edu](mailto:feinberg@andrew.cmu.edu)

|             | Sylgard 184<br>1.72 MPa | 5:1<br>1.34 MPa | 1:1<br>830 kPa | 1:5<br>130 kPa | 1:10<br>50 kPa | Sylgard 527<br>5 kPa |
|-------------|-------------------------|-----------------|----------------|----------------|----------------|----------------------|
| Uncoated    |                         |                 |                |                |                |                      |
| Fibronectin |                         |                 |                |                |                |                      |
| Collagen I  |                         |                 |                |                |                |                      |
| Laminin     |                         |                 |                |                |                |                      |
| Collagen IV |                         |                 |                |                |                |                      |
| Lam + Col4  |                         |                 |                |                |                |                      |

**Supplementary Figure S1: Diagram showing the 36 different substrate conditions that were screened to determine the effect of CE cell morphology and structure.** Each column represents a different PDMS formulation with a unique elastic modulus and each row represents a different ECM protein coating.

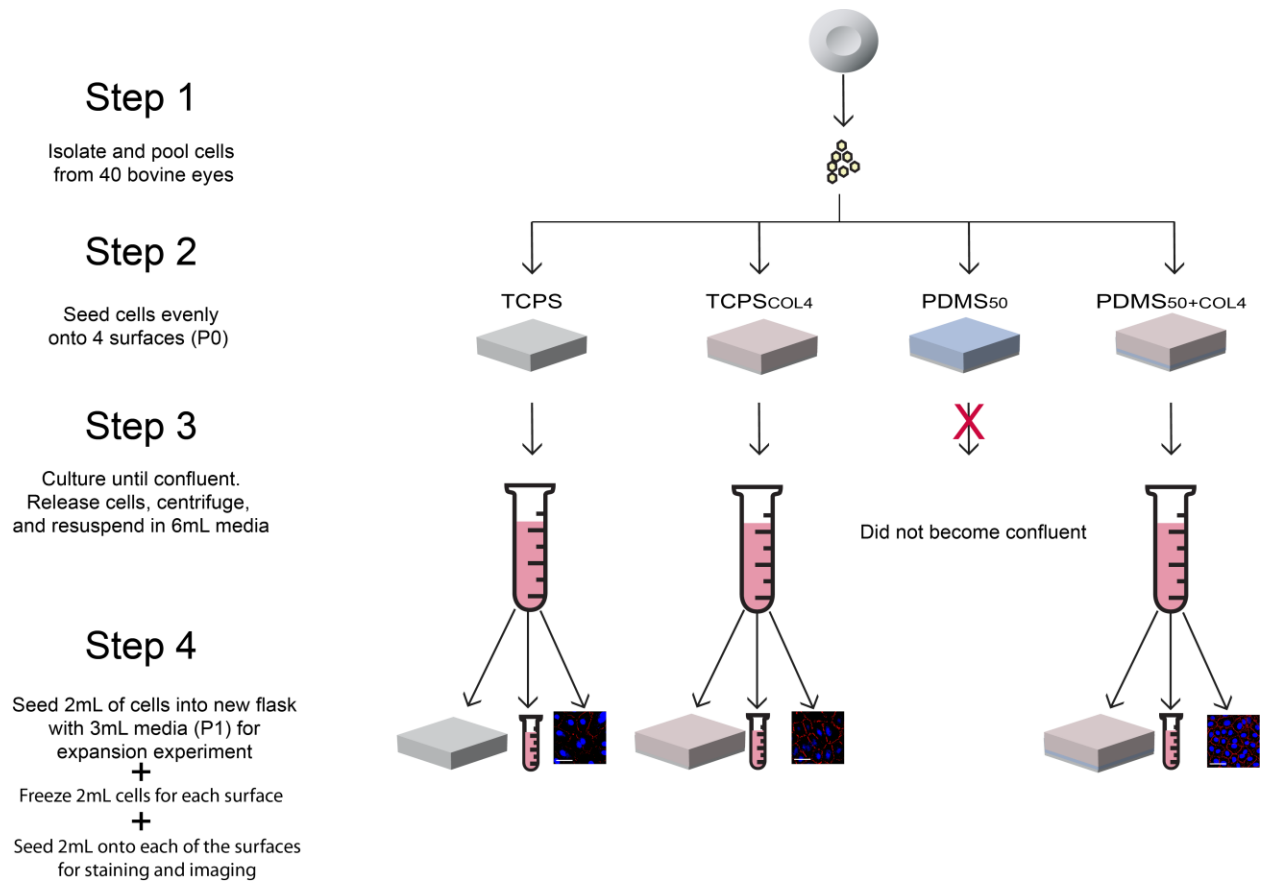

**Supplementary Figure S2: Schematic diagram of the layout for the CE cell expansion**

**experiment.** This schematic shows the serial expansion process followed from isolation of the cells from the cornea, through passage 10.

**Supplementary Table S1. Details of statistical analysis performed on normalized cell density as a function of culture time (Fig. 3b).**

| Passage | Power of $\alpha$ | ANOVA P-value | Bonferroni P-values                                                                                                                                 |
|---------|-------------------|---------------|-----------------------------------------------------------------------------------------------------------------------------------------------------|
| 0       | 0.999             | <0.001        | PDMS <sub>50+COL4</sub> vs. TCPS P < 0.001<br>TCPS <sub>COL4</sub> vs. TCPS P = 0.003                                                               |
| 1       | 0.962             | 0.002         | PDMS <sub>50+COL4</sub> vs. TCPS P = 0.002                                                                                                          |
| 2       | 0.969             | 0.002         | PDMS <sub>50+COL4</sub> vs. TCPS P = 0.001<br>TCPS <sub>COL4</sub> vs. TCPS P = 0.040                                                               |
| 3       | 0.987             | <0.001        | PDMS <sub>50+COL4</sub> vs. TCPS P < 0.001                                                                                                          |
| 4       | 1.000             | <0.001        | PDMS <sub>50+COL4</sub> vs. TCPS P < 0.001<br>TCPS <sub>COL4</sub> vs. TCPS P = 0.039<br>PDMS <sub>50+COL4</sub> vs. TCPS <sub>COL4</sub> P = 0.005 |
| 5       | 0.989             | <0.001        | PDMS <sub>50+COL4</sub> vs. TCPS P < 0.001<br>PDMS <sub>50+COL4</sub> vs. TCPS <sub>COL4</sub> P = 0.013                                            |
| 6       | 1.000             | <0.001        | PDMS <sub>50+COL4</sub> vs. TCPS P < 0.001<br>TCPS <sub>COL4</sub> vs. TCPS P = 0.018<br>PDMS <sub>50+COL4</sub> vs. TCPS <sub>COL4</sub> P < 0.001 |
| 7       | 0.997             | <0.001        | PDMS <sub>50+COL4</sub> vs. TCPS P < 0.001<br>PDMS <sub>50+COL4</sub> vs. TCPS <sub>COL4</sub> P = 0.004                                            |
| 8       | 0.999             | <0.001        | PDMS <sub>50+COL4</sub> vs. TCPS P < 0.001<br>PDMS <sub>50+COL4</sub> vs. TCPS <sub>COL4</sub> P < 0.001                                            |
| 9       | 0.999             | <0.001        | PDMS <sub>50+COL4</sub> vs. TCPS P < 0.001<br>PDMS <sub>50+COL4</sub> vs. TCPS <sub>COL4</sub> P = 0.001                                            |
| 10      | 0.992             | <0.001        | PDMS <sub>50+COL4</sub> vs. TCPS P = 0.001<br>PDMS <sub>50+COL4</sub> vs. TCPS <sub>COL4</sub> P = 0.003                                            |

The three groups were statistically compared at each passage to determine any differences in cell density. Data was tested for normality using the Shapiro-Wilk normality test ( $P > 0.050$ ) and passed at each passage. Statistical analysis was done using a one-way ANOVA ( $\alpha$  set to 0.050) with Bonferroni post-hoc test to determine statistical significance. The above table shows the exact  $\alpha$  and P values reported for the ANOVA test, as well as the P values for each comparison found to statistically significant by the Bonferroni post-hoc test. For each passage, TCPS n=4, TCPS<sub>COL4</sub> n=5, PDMS<sub>50+COL4</sub> n=5.

**Supplementary Table S2. Details of statistical analysis performed on cell area as a function of culture time (Fig. 3d).**

| Passage | H value  | Degrees of Freedom | P-value for ANOVA on the Ranks | Dunn's Comparisons with P values <0.05                                                                                |
|---------|----------|--------------------|--------------------------------|-----------------------------------------------------------------------------------------------------------------------|
| 1       | 1051.022 | 2                  | P = < 0.001                    | PDMS <sub>50+COL4</sub> vs. TCPS<br>TCPS <sub>COL4</sub> vs. TCPS<br>PDMS <sub>50+COL4</sub> vs. TCPS <sub>COL4</sub> |
| 5       | 313.394  | 2                  | P = < 0.001                    | PDMS <sub>50+COL4</sub> vs. TCPS<br>TCPS <sub>COL4</sub> vs. TCPS<br>PDMS <sub>50+COL4</sub> vs. TCPS <sub>COL4</sub> |
| 8       | 204.578  | 2                  | P = < 0.001                    | PDMS <sub>50+COL4</sub> vs. TCPS<br>PDMS <sub>50+COL4</sub> vs. TCPS <sub>COL4</sub>                                  |

The three groups were statistically compared at each passage to determine any differences in cell area. Data was tested for normality using the Shapiro-Wilk normality test ( $P > 0.050$ ) and failed at each passage. Statistical analysis was done using a one-way ANOVA on the ranks with Dunn's pairwise comparison to determine statistical significance. The table above shows the H values, degrees of freedom, P value for the ANOVA on the ranks, and those pairwise comparisons that had a  $P < 0.050$ . (*Ex vivo* cornea n = 2674; TCPS P1 n = 401, P5 n = 353, and P8 n = 135; TCPS<sub>COL4</sub> P1 n = 846, P5 n = 443, and P8 n = 98; and PDMS<sub>50+COL4</sub> P1 n = 1503, P5 n = 673, and P8 n = 318.)

**Supplementary Table S3. Details of statistical analysis performed the percent of  $\alpha$ -SMA positive cells as a function time (Fig. 4c).**

| Passage | H value | Degrees of Freedom | P-value for ANOVA on the Ranks | Dunn's Comparisons with P values <0.05                                               |
|---------|---------|--------------------|--------------------------------|--------------------------------------------------------------------------------------|
| 1       | 6.147   | 2                  | P = 0.046                      | PDMS <sub>50+COL4</sub> vs. TCPS                                                     |
| 5       | 11.942  | 2                  | P = 0.003                      | PDMS <sub>50+COL4</sub> vs. TCPS<br>PDMS <sub>50+COL4</sub> vs. TCPS <sub>COL4</sub> |

The three groups were statistically compared at each passage to determine any differences in percent  $\alpha$ -SMA positive nuclei. Data was tested for equal variance and failed at P1 and was tested for normality using the Shapiro-Wilk normality test ( $P < 0.050$ ) and failed at P5. Statistical analysis was done using a one-way ANOVA on the ranks with Tukey test to determine statistical significance. The table above shows the H values, degrees of freedom, P value for the ANOVA on the ranks, and those pairwise comparisons that had a  $P < 0.050$ .

**Supplementary Table S4. Details of statistical analysis performed on the hexagon shape factor as a function of time (Fig. 4d).**

| Passage | H value | Degrees of Freedom | P-value for ANOVA on the Ranks | Dunn's Comparisons with P values <0.05                                                                                |
|---------|---------|--------------------|--------------------------------|-----------------------------------------------------------------------------------------------------------------------|
| 1       | 34.852  | 2                  | P = <0.001                     | PDMS <sub>50+COL4</sub> vs. TCPS <sub>COL4</sub><br>TCPS <sub>COL4</sub> vs. TCPS                                     |
| 5       | 171.034 | 2                  | P = <0.001                     | PDMS <sub>50+COL4</sub> vs. TCPS<br>PDMS <sub>50+COL4</sub> vs. TCPS <sub>COL4</sub><br>TCPS <sub>COL4</sub> vs. TCPS |

The three groups were statistically compared at each passage to determine any differences in the hexagon shape factor. Data for normality using the Shapiro-Wilk normality test ( $P < 0.050$ ) and failed at P1 and P5. Statistical analysis was done using a one-way ANOVA on the ranks with Dunn's pairwise comparison to determine statistical significance. The table above shows the H values, degrees of freedom, P value for the ANOVA on the ranks, and those pairwise comparisons that had a  $P < 0.050$ . (*Ex vivo* cornea  $n = 2674$ ; TCPS P1  $n = 401$ , P5  $n = 353$ ; TCPS<sub>COL4</sub> P1  $n = 846$ , P5  $n = 443$ ; and PDMS<sub>50+COL4</sub> P1  $n = 1503$ , P5  $n = 673$ .)

**Supplementary Table S5. Details of statistical analysis performed on the cell density of the engineered CEs (Fig. 5b).**

| Time point | Power of $\alpha$ | ANOVA P-value | Tukey test P-value                               |           |
|------------|-------------------|---------------|--------------------------------------------------|-----------|
| 48 hours   | 0.895             | 0.009         | PDMS <sub>50+COL4</sub> vs. TCPS                 | P = 0.008 |
|            |                   |               | PDMS <sub>50+COL4</sub> vs. TCPS <sub>COL4</sub> | P = 0.044 |

The three groups were statistically compared to determine any differences in cell density. Data was tested for normality using the Shapiro-Wilk normality test ( $P > 0.050$ ) and passed. Statistical analysis was done using a one-way ANOVA ( $\alpha$  set to 0.050) with Tukey test to determine statistical significance. The above table shows the exact  $\alpha$  and P values reported for the ANOVA test, as well as the P values for each comparison found to statistically significant by the Tukey test. TCPS n=3, TCPS<sub>COL4</sub> n=3, PDMS<sub>50+COL4</sub> n=3.
